# Supplementary material for: Adherence to predefined dietary patterns and incident type 2 diabetes in European populations: EPIC-InterAct Study
Source: Springer Nature journal article supplement (doi:10.1007/s00125-013-3092-9), 2013-11-06
Supplement: MOESM1 [file 8091952]

**ESM Table 1** Definition and contents of the food groups considered in the analysis, EPIC-InterAct study

| Food group                     | Definition and content                                                                                                                                  |
|--------------------------------|---------------------------------------------------------------------------------------------------------------------------------------------------------|
| Vegetables <sup>a</sup>        | All kinds of vegetables including leafy, fruiting and root vegetables, cabbages, mushrooms, grain and pod vegetables, onions, stalk vegetables, sprouts |
| Root vegetables <sup>a</sup>   | E.g. carrots, radish, turnip                                                                                                                            |
| Cabbages                       | Broccoli, cauliflower, Brussels sprouts and other cabbages                                                                                              |
| Legumes                        | Peas, lentils and beans                                                                                                                                 |
| Fruits                         | All kinds of fruits, e.g. apples, grapes, citrus fruits, stone fruits, berries                                                                          |
| Nuts                           | Nuts and seeds                                                                                                                                          |
| Dairy products                 | Milk and milk beverages, yoghurt, curd, cheese, cream desserts and puddings (milk based), dairy creams                                                  |
| Grains / Cereals               | All kinds of cereals, e.g. bread, pasta, rice, breakfast cereals, flour, semolina, dough                                                                |
| Breakfast cereals <sup>b</sup> | E.g. cornflakes, muesli, puffed rice, porridge                                                                                                          |
| Non-white bread                | Wholemeal bread, rye bread, cereal bread, brown/wheat bread                                                                                             |
| White bread                    | White bread, hamburger bread                                                                                                                            |
| Refined grains                 | Includes white bread, pasta and rice and biscuits                                                                                                       |
| Salty biscuits                 | E.g. tortilla chips, potato chips, cheese crackers                                                                                                      |
| Red meat                       | Beef, veal, pork, mutton/lamb, horse, goat                                                                                                              |
| Poultry                        | Chicken, turkey, duck, goose and rabbit                                                                                                                 |

|                             |                                                                                      |
|-----------------------------|--------------------------------------------------------------------------------------|
| Processed meat              | Processed meat from red meat or poultry (e.g. ham, bacon, sausages, etc.)            |
| Fish                        | Fish and fish products, crustaceans and molluscs                                     |
| Fats and oils               | Vegetable oils, butter, margarine                                                    |
| Sweets                      | Chocolate, candy bars, ice cream, water ice, sugar-sweetened soft drinks             |
| Honey, jam, sugar           | Honey, jam/syrup, sugars (white or brown sugar, fructose)                            |
| Sugar-sweetened soft drinks | Carbonated/soft/isotonic drinks, diluted syrups, sweetened                           |
| Diet soft drinks            | Carbonated/soft/isotonic drinks, diluted syrups, artificially sweetened, unsweetened |
| Coffee                      | Caffeinated and decaffeinated coffee                                                 |
| Wine                        | Red/white/rose wine and non-specified wines                                          |
| Beer                        | Beer, cider and drinks based on beer/cider                                           |
| Dressing sauces             | E.g. salad dressing sauce, vinaigrette, oil and vinegar-salad sauce, French dressing |

---

<sup>a</sup> The intake of potatoes is not included.

<sup>b</sup> The intake of breakfast cereals in g/day was weighted by the fibre content of the breakfast cereals.
