# Supplementary material for: Adherence to predefined dietary patterns and incident type 2 diabetes in European populations: EPIC-InterAct Study
Source: Springer Nature journal article supplement (doi:10.1007/s00125-013-3092-9), 2013-11-06

**ESM Fig. 1** Country-specific HRs for developing type 2 diabetes for a 1 SD increment in the aHEI score according to the country-specific mean age; EPIC-InterAct study (n=21,616)

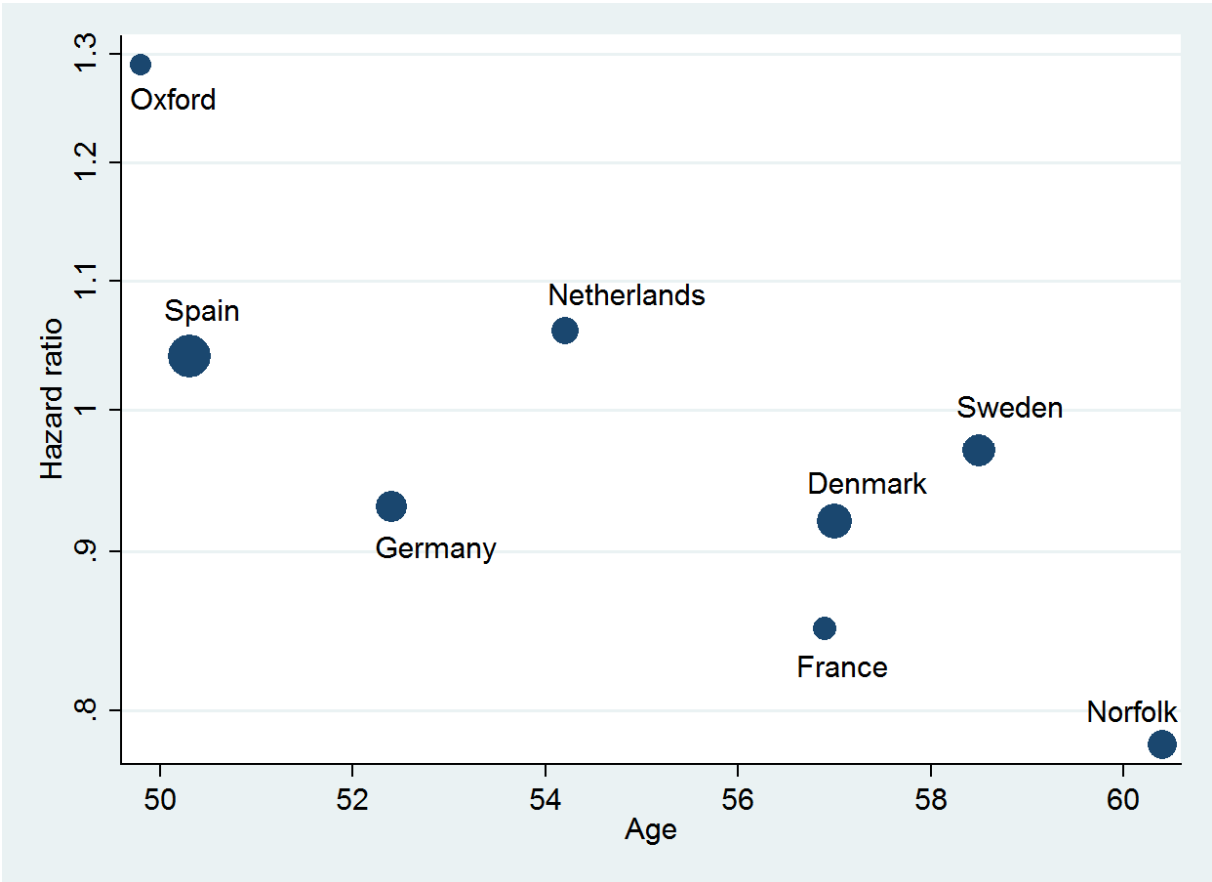

Supplement: MOESM3 [file 8091952]
